# Supplementary material for: Causes and countermeasures for repeated outbreaks of hepatitis A among adults in Korea
Source: PubMed Central journal article supplement (PMC6883026; doi:10.4178/epih.e2019038), 2019-09-22
Supplement: epih-41-e2019038-supplementary.pdf [file epih-41-e2019038-supplementary.pdf]

-SUPPLEMENTARY MATERIAL-

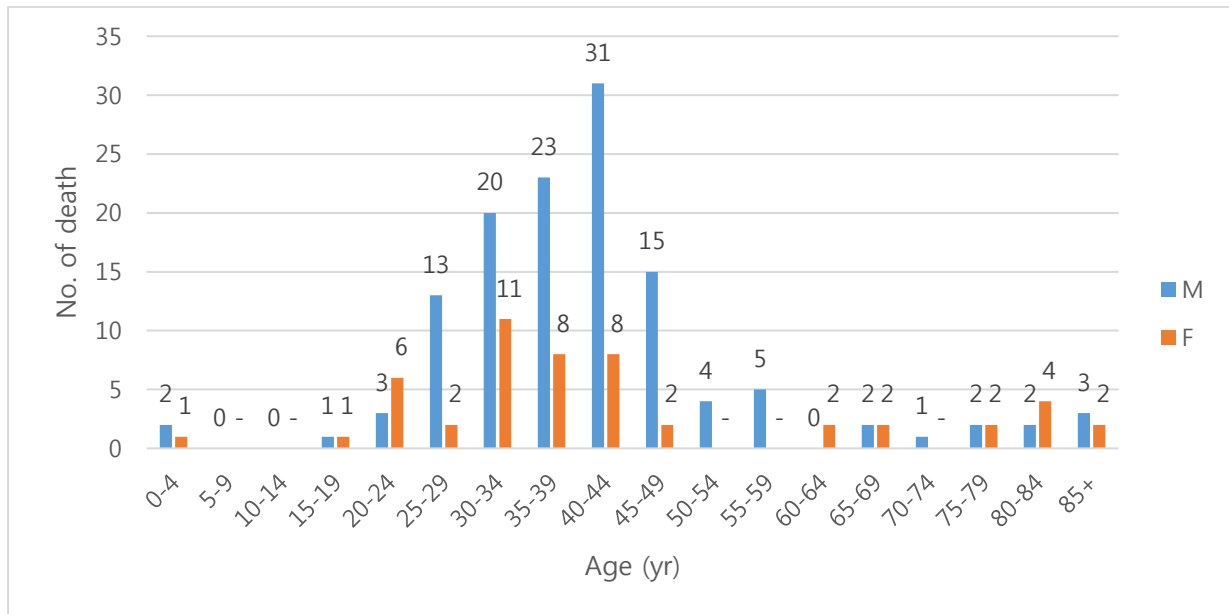

Supplementary Material 1. Age and sex distributions of hepatitis A deaths in South Korea, 2000–2017.
